# Supplementary material for: Development of radical initiator based on o-imino-isourea capable of photo/thermal polymerization
Source: Royal Society of Chemistry journal article supplement (doi:10.1039/d3ra07296g), 2023-01-01
Supplement: d3ra07296g1.pdf [file d3ra07296g1.pdf]

## **Development of Radical Initiator Based on *o*-imino-isourea Capable of Photo/Thermal Polymerization**

Eun Jeong Seo<sup>a,b</sup>, Hyocheol Jung<sup>a</sup>, Ji-Eun Jeong<sup>a</sup>, Sang-Ho Lee<sup>a</sup>, Jin Chul Kim<sup>a</sup>,

Dong Yeon Kim<sup>c</sup>, Seungju Kim<sup>b</sup>, Kyu Cheol Lee<sup>a,b\*</sup>, Young Il Park<sup>a,d\*</sup>

<sup>a</sup>Research Center for Advanced Specialty Chemicals, Korea Research Institute of Chemical Technology, Ulsan 44412, Republic of Korea

<sup>b</sup>Department of Applied Chemistry·Food Science Technology, Dong-Eui University, 176 Eomgwangro, Busan, 47340, South Korea

<sup>c</sup>Department of Chemical Engineering, Ulsan National Institute of Science and Technology (UNIST), Ulsan 44919, Republic of Korea

<sup>d</sup>Advanced Materials and Chemical Engineering, University of Science and Technology (UST), Daejeon 34113, Republic of Korea

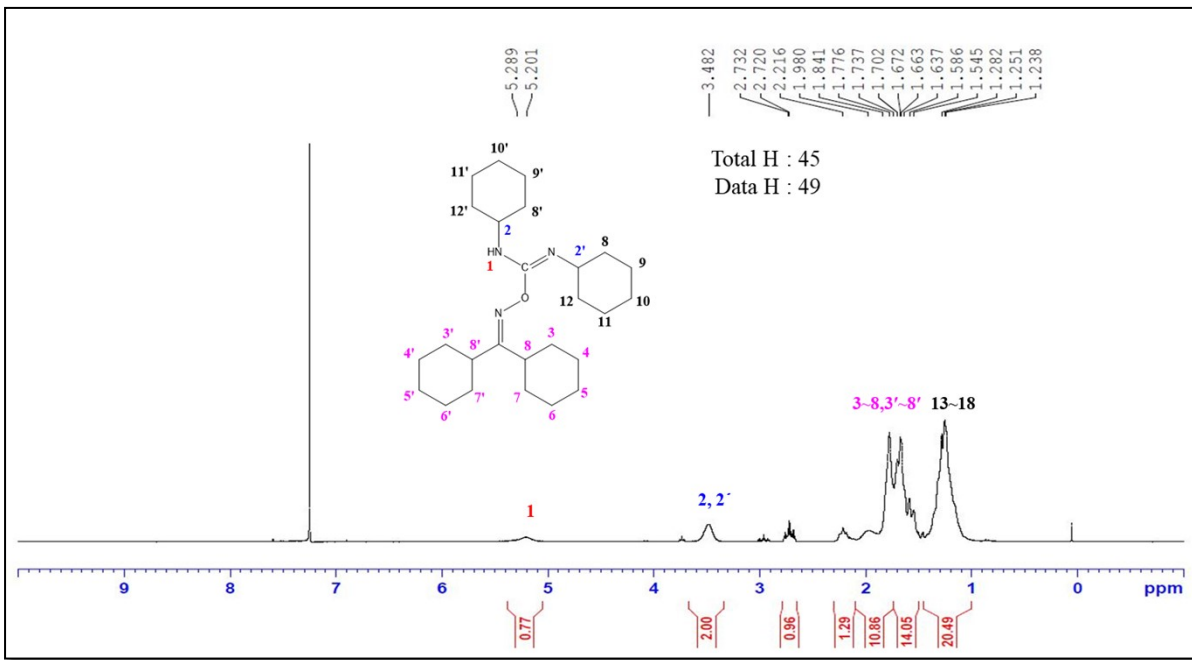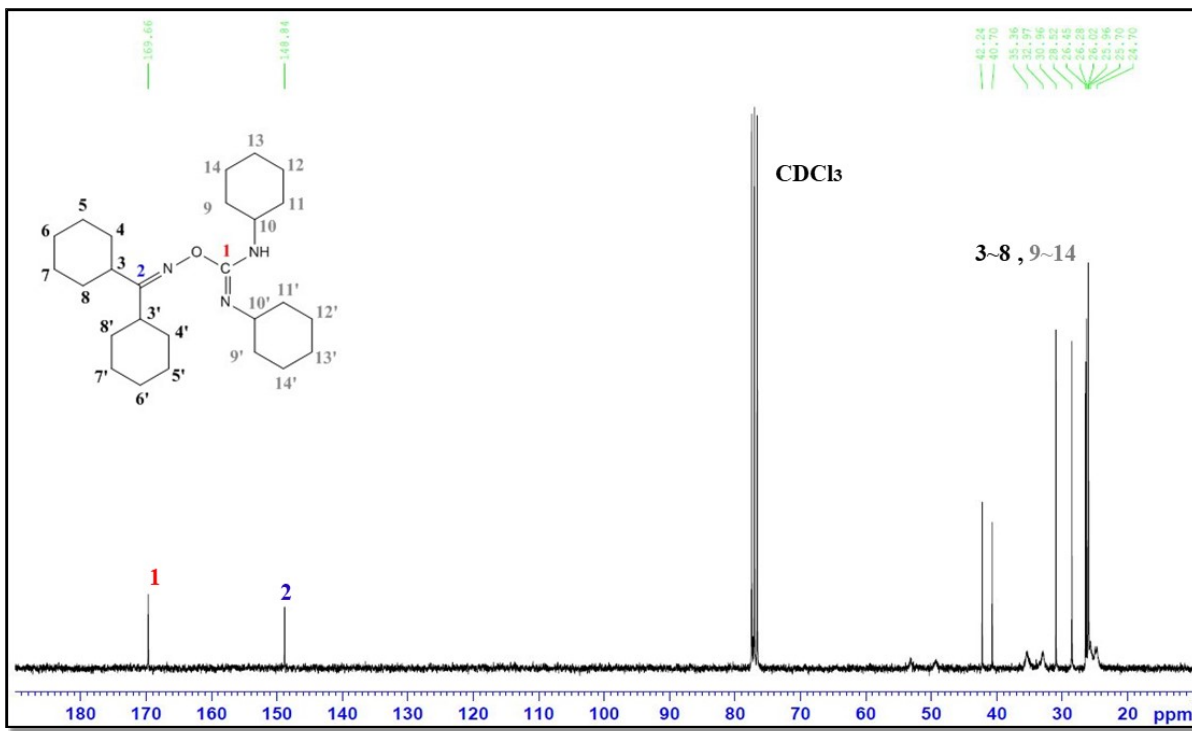

Figure S1. H and C-NMR of Dicyhe-DCC

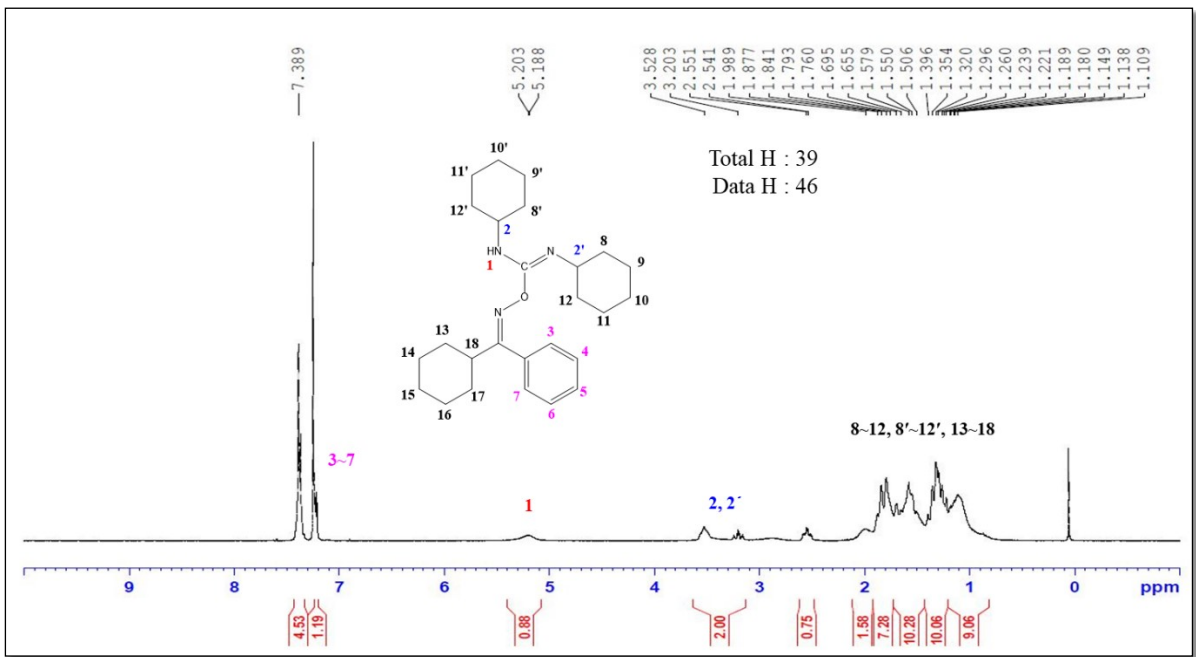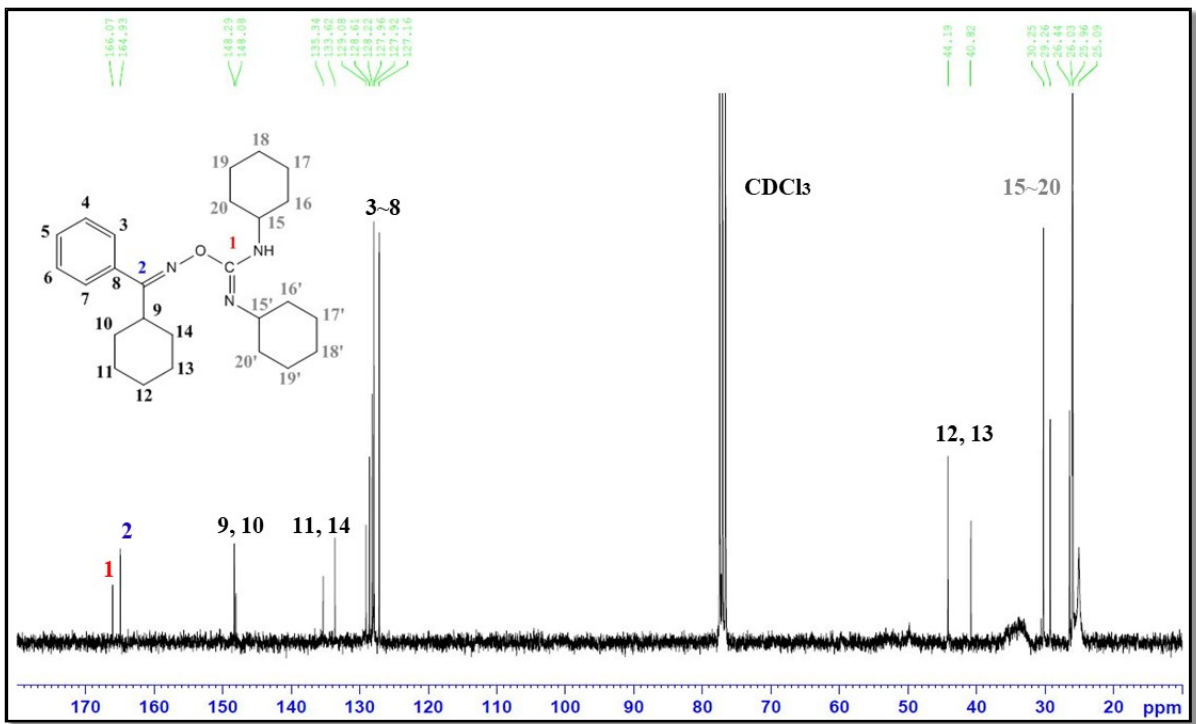

Figure S2. H and C-NMR of Cyheph-DCC

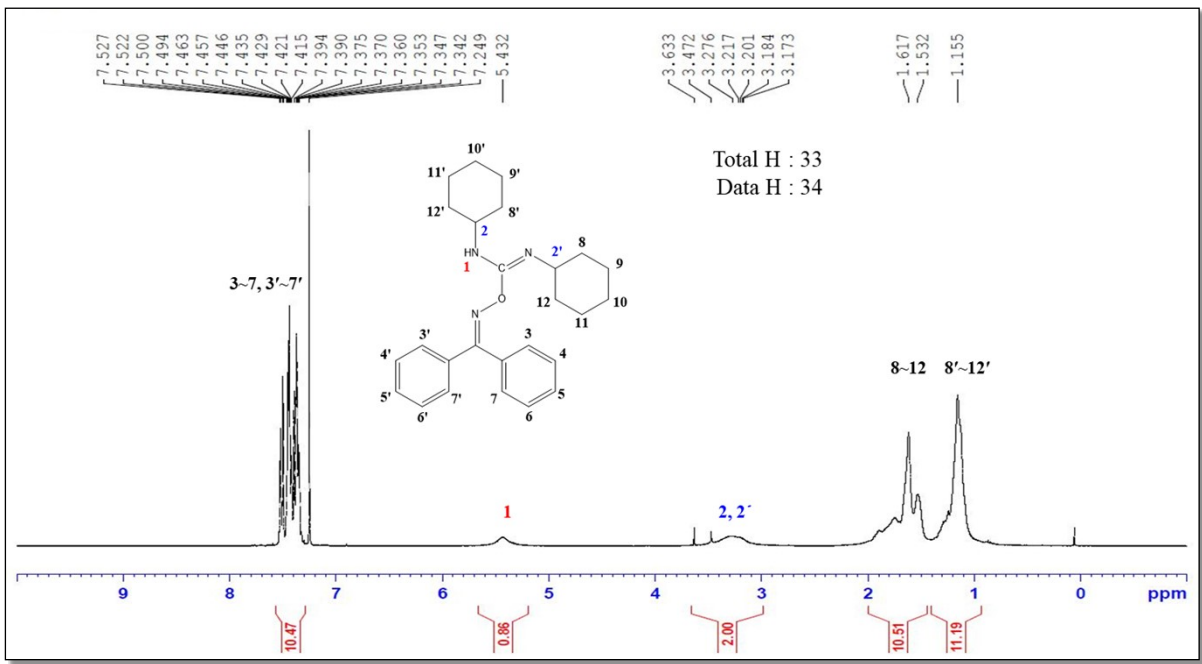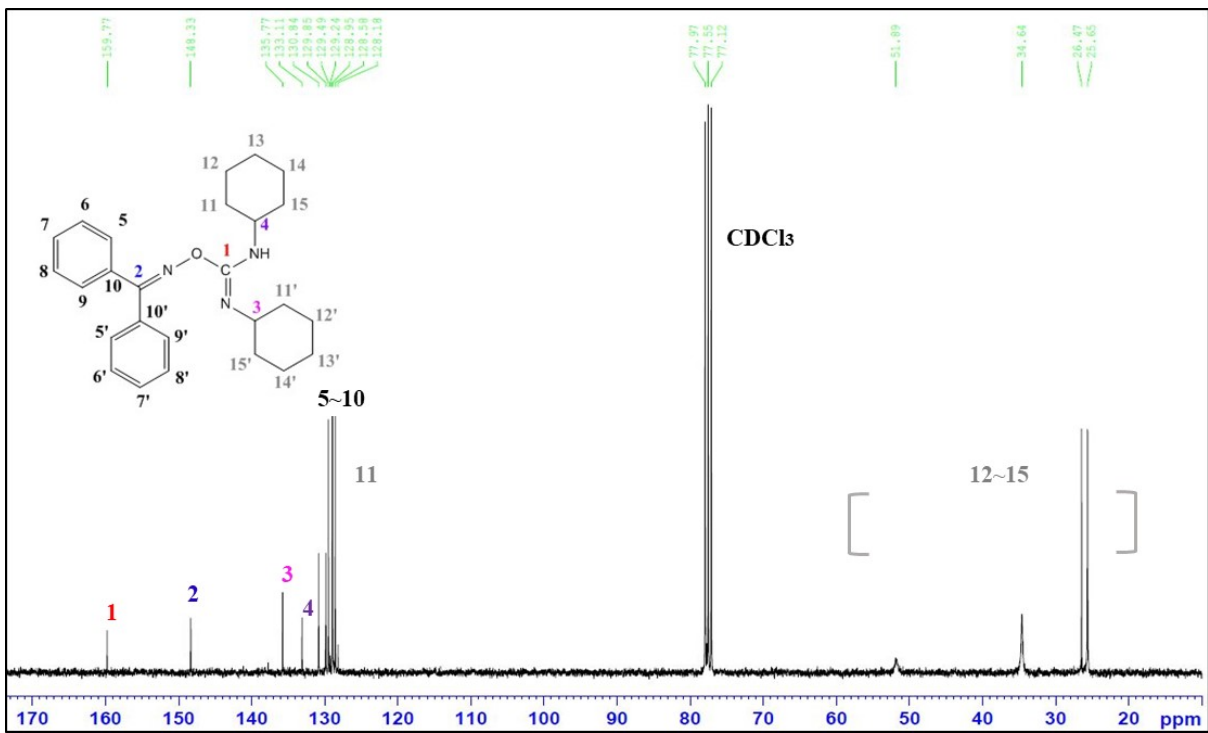

Figure S3. H and C-NMR of Cyheph-DCC

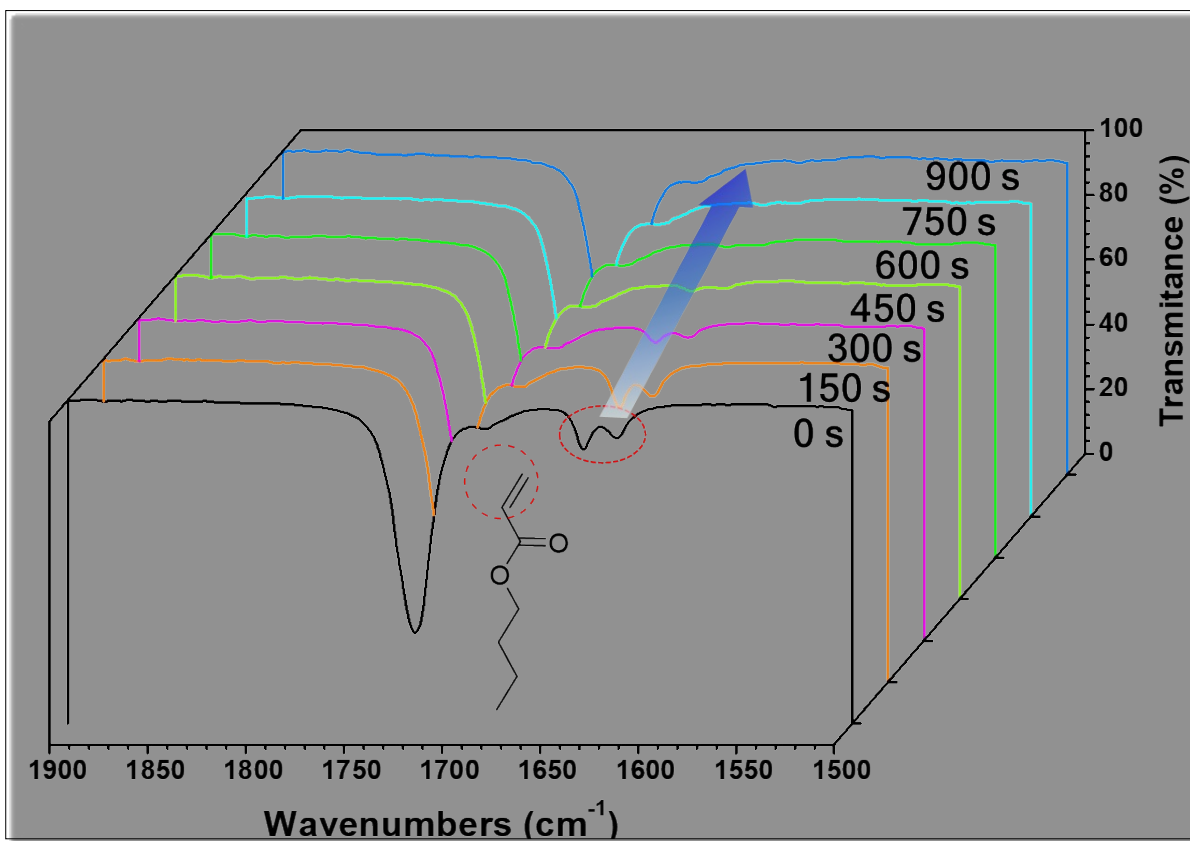

Figure S4. Conversion spectra of photoradical polymerization using FT-IR

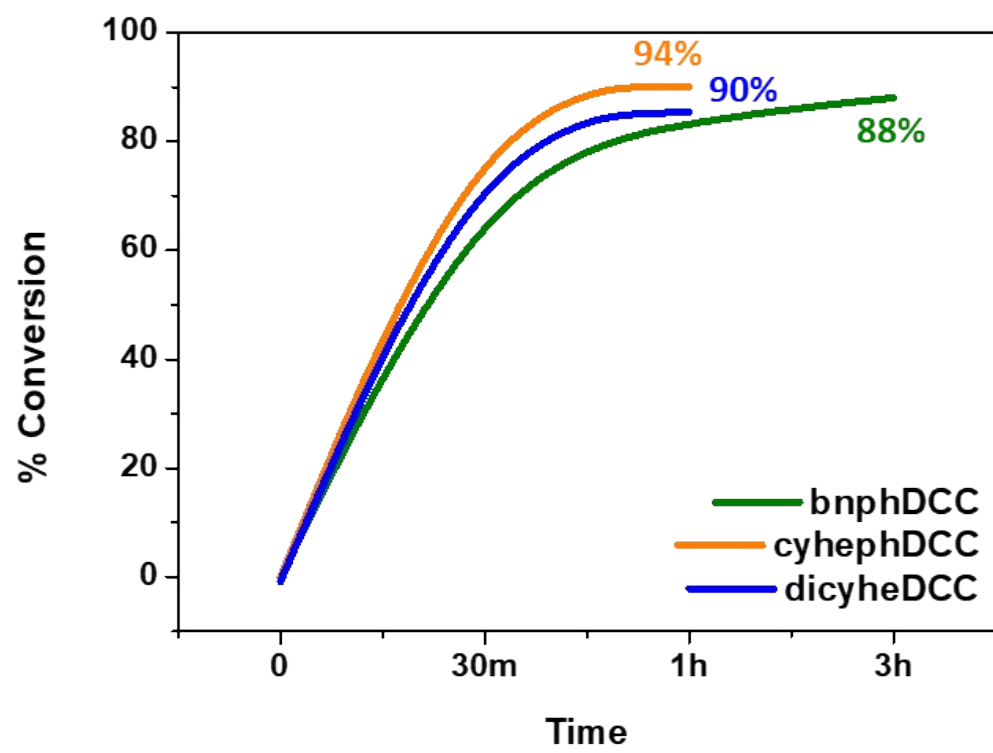

Figure S5. Conversion data of thermal polymerization in n-butyl acrylate using FRIs.
